# Supplementary material for: The Antioxidant Response Induced by Lonicera caerulaea Berry Extracts in Animals Bearing Experimental Solid Tumors
Source: MDPI journal article supplement (doi:10.3390/molecules13051195), 2008-05-27
Supplement: s1 [file s1]

Correction

**Correction: Gruia, M.-I. *et al.* The Antioxidant Response Induced by *Lonicera caerulea* Berry Extracts in Animals Bearing Experimental Solid Tumors. *Molecules* 2008, 13, 1195-1206.**

Maria Iuliana Gruia <sup>1</sup>, Eliza Oprea <sup>2</sup>, Ion Gruia <sup>3</sup>, Valentina Negoita <sup>1</sup> and Ileana Cornelia Farcasanu <sup>2,\*</sup>

<sup>1</sup> Institute of Oncology Bucharest, 252 Fundeni, 022338, Bucharest, Romania

<sup>2</sup> University of Bucharest, Faculty of Chemistry, 4-12 Regina Elisabeta, 030018, Bucharest, Romania

<sup>3</sup> University of Bucharest, Faculty of Physics, MG-11 Magurele, 077125, Bucharest, Romania

\* Author to whom correspondence should be addressed; E-mail: farcasanu.ileana@unibuc.ro

Received: 18 February 2009 / Published: 24 February 2009

---

In the original published version of this paper [1] we omitted to acknowledge that the work was supported by a grant-in-aid. The acknowledgment is hereby published as follows.

**Acknowledgments**

This work was partially supported by the Romanian Ministry of Education and Research through the PNII Grant-in-Aid, Idei\_965/2007.

**References**

1. Gruia, M.I.; Oprea, E.; Gruia, I.; Negoita, V.; Farcasanu, I.C. The Antioxidant Response Induced by *Lonicera caerulea* Berry Extracts in Animals Bearing Experimental Solid Tumors. *Molecules* **2008**, *13*, 1195-1206.

© 2009 by the authors; licensee Molecular Diversity Preservation International, Basel, Switzerland. This article is an open-access article distributed under the terms and conditions of the Creative Commons Attribution license (<http://creativecommons.org/licenses/by/3.0/>).
